# Supplementary material for: AIAP: A Quality Control and Integrative Analysis Package to Improve ATAC-seq Data Analysis
Source: PubMed Central journal article supplement (PMC9040017; doi:10.1016/j.gpb.2020.06.025), 2021-07-15

A

| ID | Assay    | Sample |
|----|----------|--------|
| 0  | ATAC-seq | 22-2a  |
| 1  | ATAC-seq | 22-4a  |
| 2  | ATAC-seq | 22-5a  |

Choose genome assembly:

Mouse mm10

Current selected: 22-2a ATAC-seq, 22-4a ATAC-seq, 22-5a ATAC-seq

Update

Chart width: 800 px

Chart height: 400 px

B Mapping

Standards based on useful single ends, Good: 40000000, Acceptable: 25000000

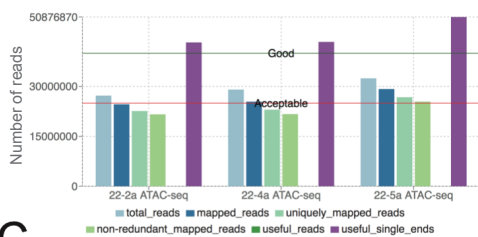

C chrM rate

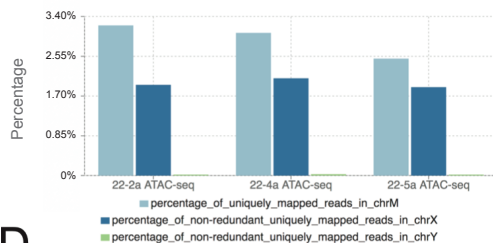

D Autosome mapping distribution

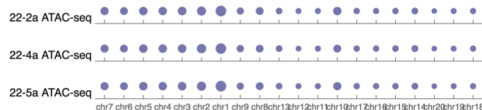

E Library complexity

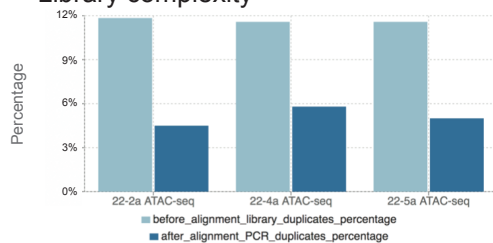

F Insert size distribution

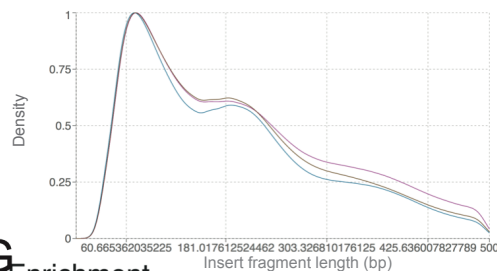

G Enrichment

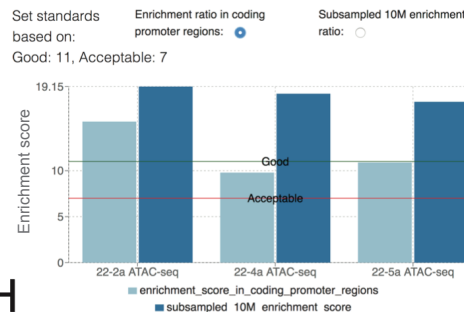

H

Background

Standards for background, Good: 10%, Acceptable: 20%

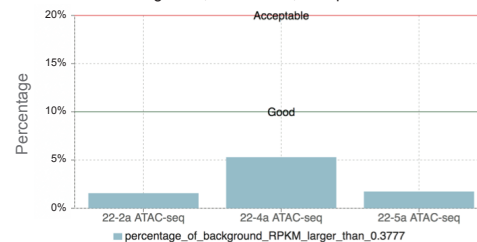

I

Peaks

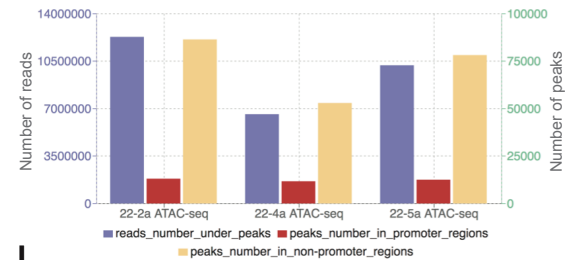

J

RUPr

Standards for reads percentage under peaks, Good: 20%, Acceptable: 12%

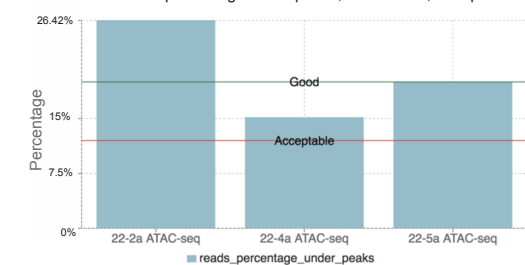

K

Peak size distribution

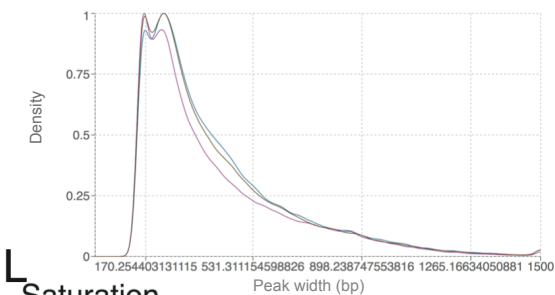

L

Saturation

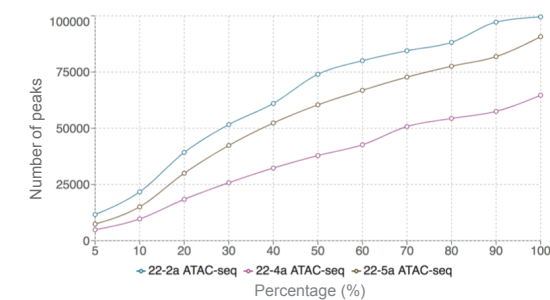

Supplement: mmc1.pdf [file mmc1.pdf]
