# Supplementary material for: AIAP: A Quality Control and Integrative Analysis Package to Improve ATAC-seq Data Analysis
Source: PubMed Central journal article supplement (PMC9040017; doi:10.1016/j.gpb.2020.06.025), 2021-07-15
Supplement: mmc2.pdf [file mmc2.pdf]

- mm10\_forebrain\_E11.5\_PE\_bio1\_ENCLB512IZL\_1
- mm10\_forebrain\_E12.5\_PE\_bio1\_ENCLB949MHR\_1
- mm10\_forebrain\_E14.5\_PE\_bio2\_ENCLB312MJN\_1
- mm10\_hindbrain\_E13.5\_PE\_bio2\_ENCLB558GZX\_1
- mm10\_intestine\_E16.5\_PE\_bio2\_ENCLB539OPC\_1
- mm10\_kidney\_E15.5\_PE\_bio1\_ENCLB874ZPR\_1
- mm10\_kidney\_E15.5\_PE\_bio2\_ENCLB024QLK\_1
- mm10\_kidney\_E14.5\_PE\_bio1\_ENCLB087XNG\_1
- mm10\_kidney\_P0\_PE\_bio1\_ENCLB678YRF\_1
- mm10\_liver\_E11.5\_PE\_bio1\_ENCLB441LCB\_1

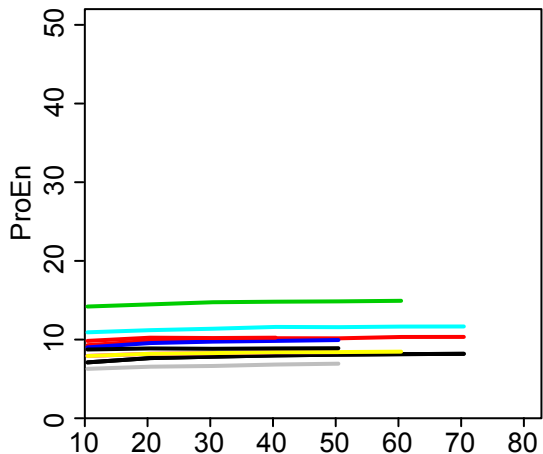

Sequencing depth: number of reads ( $\times 10^6$ )

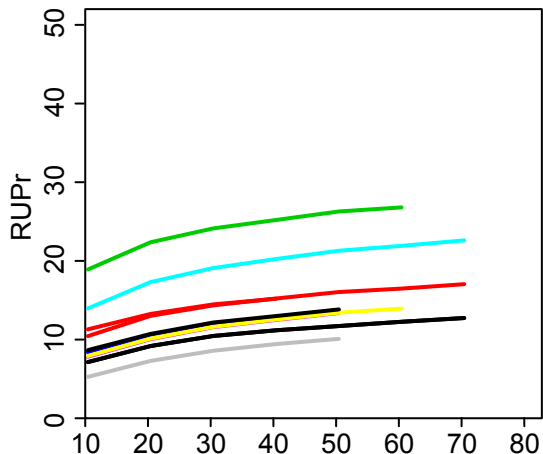

Sequencing depth: number of reads ( $\times 10^6$ )

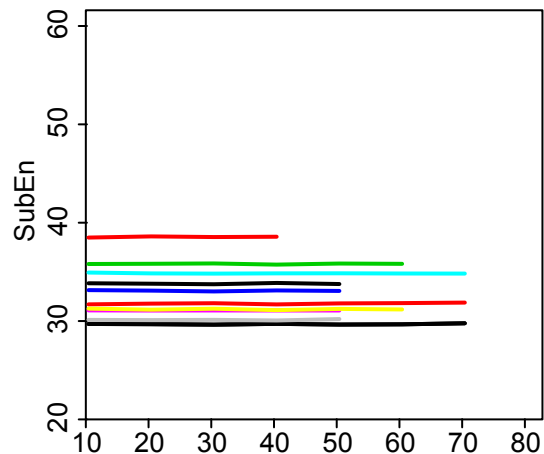

Sequencing depth: number of reads ( $\times 10^6$ )
