# Supplementary material for: AIAP: A Quality Control and Integrative Analysis Package to Improve ATAC-seq Data Analysis
Source: Genomics Proteomics Bioinformatics. 2021 Jul 15;19(4):641–51. doi: 10.1016/j.gpb.2020.06.025 (PMC9040017; doi:10.1016/j.gpb.2020.06.025)
Supplement: Supplementary Figure S3 — Enriched epigenetic modifications on the shared DARs between PE-noShift mode and PE-asSE mode Left to right: ATAC-seq, H3K27ac ChIP-seq, H3K4me1 ChIP-seq, H3K4me3 ChIP-seq, DNA methylation. Top: embryonic day 11.5; Bottom: postnatal day 0. DAR, differentially accessible region. [file mmc3.pdf]

E11.5 stage

ATAC-seq enrichment

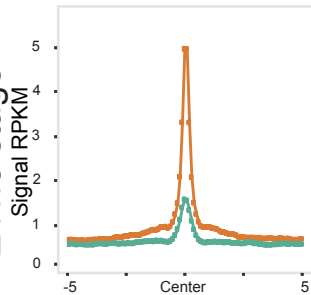

H3K27ac enrichment

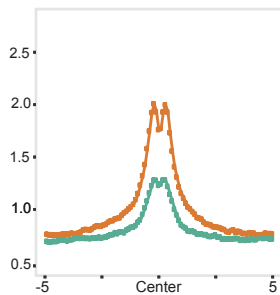

H3K4me1 enrichment

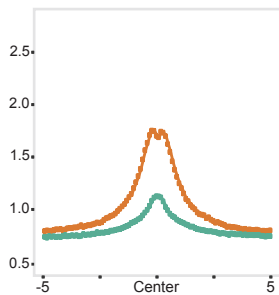

H3K4me3 enrichment

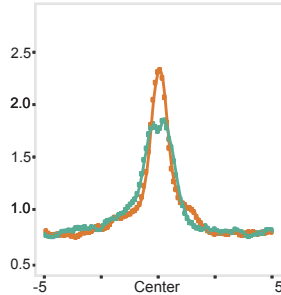

DNA methylation

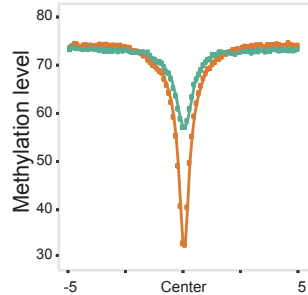

P0 stage

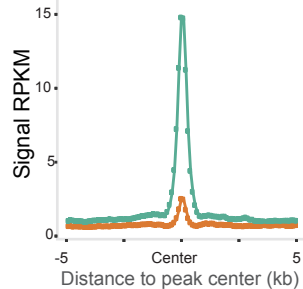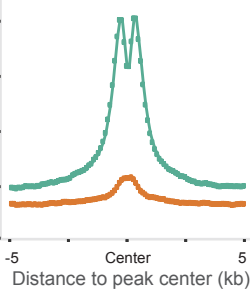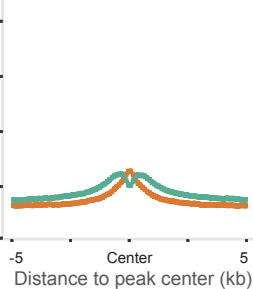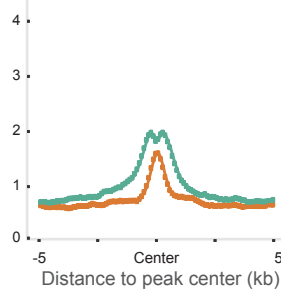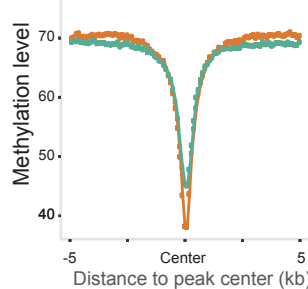

— E11.5 highly opened DARs (Shared)

— P0 highly opened DARs (Shared)
